# Supplementary material for: Tracking Source Variations of Inhalation Cancer Risks and Ozone Formation Potential in Hong Kong over Two Decades (2000–2020) Using Toxic Air Pollutant Monitoring Data
Source: PubMed Central journal article supplement — Environ Health (Wash). 2024 May 23;2(6):411–21. doi: 10.1021/envhealth.3c00209 (PMC11504198; doi:10.1021/envhealth.3c00209), 2024-05-23
Supplement: eh3c00209_si_001.pdf [file eh3c00209_si_001.pdf]

**Supporting Information**  
**for**  
**Tracking Source Variations of Inhalation Cancer Risks and**  
**Ozone Formation Potential in Hong Kong over Two Decades**  
**(2000–2020) Using Toxic Air Pollutant Monitoring Data**

Yee Ka Wong<sup>1</sup>, Wai Wai Chan<sup>2</sup>, Dasa Gu<sup>1</sup>, Jian Zhen Yu<sup>1,2,3,\*</sup>, Alexis K. H. Lau<sup>1,2,4,\*</sup>

<sup>1</sup>Division of Environment and Sustainability, The Hong Kong University of Science and Technology, Clear Water Bay, Kowloon, Hong Kong 000000, China

<sup>2</sup>Institute for the Environment, The Hong Kong University of Science and Technology, Clear Water Bay, Kowloon, Hong Kong 000000, China

<sup>3</sup>Department of Chemistry, The Hong Kong University of Science and Technology, Clear Water Bay, Kowloon, Hong Kong 000000, China

<sup>4</sup>Department of Civil and Environmental Engineering, The Hong Kong University of Science and Technology, Clear Water Bay, Kowloon, Hong Kong 000000, China

\*Corresponding author – Jian Zhen Yu; Division of Environment and Sustainability, Institute for the Environment, Department of Chemistry, The Hong Kong University of Science and Technology, Clear Water Bay, Kowloon, Hong Kong, China; Email: jian.yu@ust.hk

\*Corresponding author – Alexis Kai Hon Lau; Division of Environment and Sustainability, Institute for the Environment, Department of Civil and Environmental Engineering, The Hong Kong University of Science and Technology, Clear Water Bay, Kowloon, Hong Kong, China; Email: alau@ust.hk

## S1 Further details on PMF model inputs and source identification methods

Species that were measured above method detection limits (MDLs) in more than 75% of the time were included in the model. The input species uncertainties were represented by the square root of the squared sum of measurement uncertainty and half MDLs.<sup>1</sup> Concentrations below MDLs were replaced with half MDLs with uncertainties set to be  $5/6 \times \text{MDL}$ . The sample sizes for CW and TW are 484–496 for VOCs, 244 for carbonyls, 243–247 for PAHs, and 1087–1135 for PM<sub>10</sub>.

For source identification, we determined the optimal factor number based on the statistical stability of the solution and interpretability of resolved source factors. The former was evaluated using the bootstrapping and displacement functions embedded in the PMF software. The results are provided in Table S4, showing all the PMF solutions are statistically robust for source analysis. Emission sources were identified through examination of the chemical profiles and temporal variation patterns of individual factors.

To distinguish between primary and secondary sources of carbonyls, collocated measurements of NO<sub>x</sub> and O<sub>3</sub> (daily averaged from hourly data from reference monitors) were included in the model. The differentiation was aided by the use of nitric oxide and O<sub>3</sub> as a marker for primary and secondary formation, respectively. Table S5 tabulates the ratio of modeled vs. measured concentration for individual TAPs. Averaged across both sites and individual TAP groups, the models explained 91%, 78%, 78% and 97% of the observed concentrations of VOCs, carbonyls (with O<sub>3</sub> and NO<sub>x</sub>), PAHs and PM<sub>10</sub> species, respectively.

In the PMF analysis for VOCs, a source factor representing construction/renovation activities at or adjacent to the sampling location were resolved at both sites. Given these sources are not representative of the general air quality, they were excluded from subsequent risk and ozone impact calculations to avoid biased assessments. During the affected period, substantial enhancement in concentrations of certain carbonyls commonly found in solvents such as formaldehyde and benzaldehyde is noticed. However, the PMF model was not able to resolve a solution that includes this factor while being statistically robust (i.e., failed in the bootstrapping and displacement analyses) as the PMF for VOC did, plausibly due to insufficient sample size that prohibits the determination of a statistically robust solution. As a compromise, we down-weighted the carbonyls that were clearly affected by the construction/renovation in the model. Using this approach, while the model was unable to capture the high concentrations for the construction/renovation periods, it successfully apportioned concentrations that agree well with measurements outside the affected periods as shown in Figure S1. This also explains the lower ratio in modeled-to-measured concentrations for certain carbonyls in Table S5.

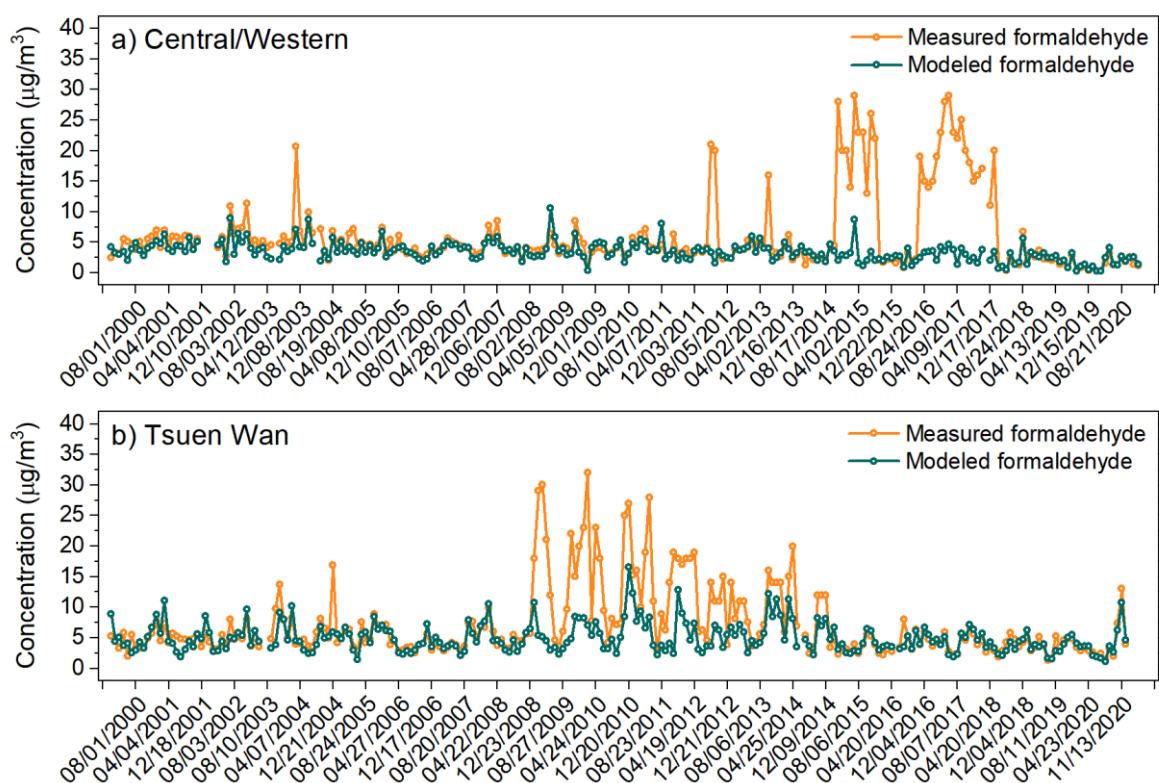

**Figure S1.** Time series of PMF-modeled versus measured concentrations of formaldehyde at (a) Central/Western and (b) Tsuen Wan sites. The discrepancy between modeled and measured concentration is attributed to the influence of local construction/renovation activities which are not captured in PMF modeling.

## S2 Sources of TAPs identified by PMF analysis

The chemical profiles of the resolved factors for each TAP group at each site are presented in Figure S2. To aid source identification, we also examine the inter-annual and seasonal variations in the contributions of individual factors, which often show source-indicative characteristics. Figure S3 displays the inter-annual trends in source contributions for nine selected sources for VOCs, carbonyls and PAHs with the most significant ICR contributions, while those for the other sources are provided in Figures S4 and S5. For each source, the trends representing the mean contribution from warmer (April to September) and colder seasons (October to February) are shown, with the shaded bands representing the standard deviation. As a result of the synoptic-scale meteorological effect arising from the Asiatic monsoon, Hong Kong tends to receive relatively cleaner marine air masses from the south in warmer seasons but more polluted air masses from the northern inland regions in colder seasons.<sup>2</sup> Hence, the warm season trend reflects more the impact of local emissions while the cold season trend is more reflective of the impact of regional transport of pollutants emitted from the inland regions. Also shown in each plot are the Theil-Sen's slope values representing the rate of change in source contribution per year, and the significance level of Mann-Kendall trend test for statistical assessment of whether the change is monotonic over the study period.<sup>3,4</sup>

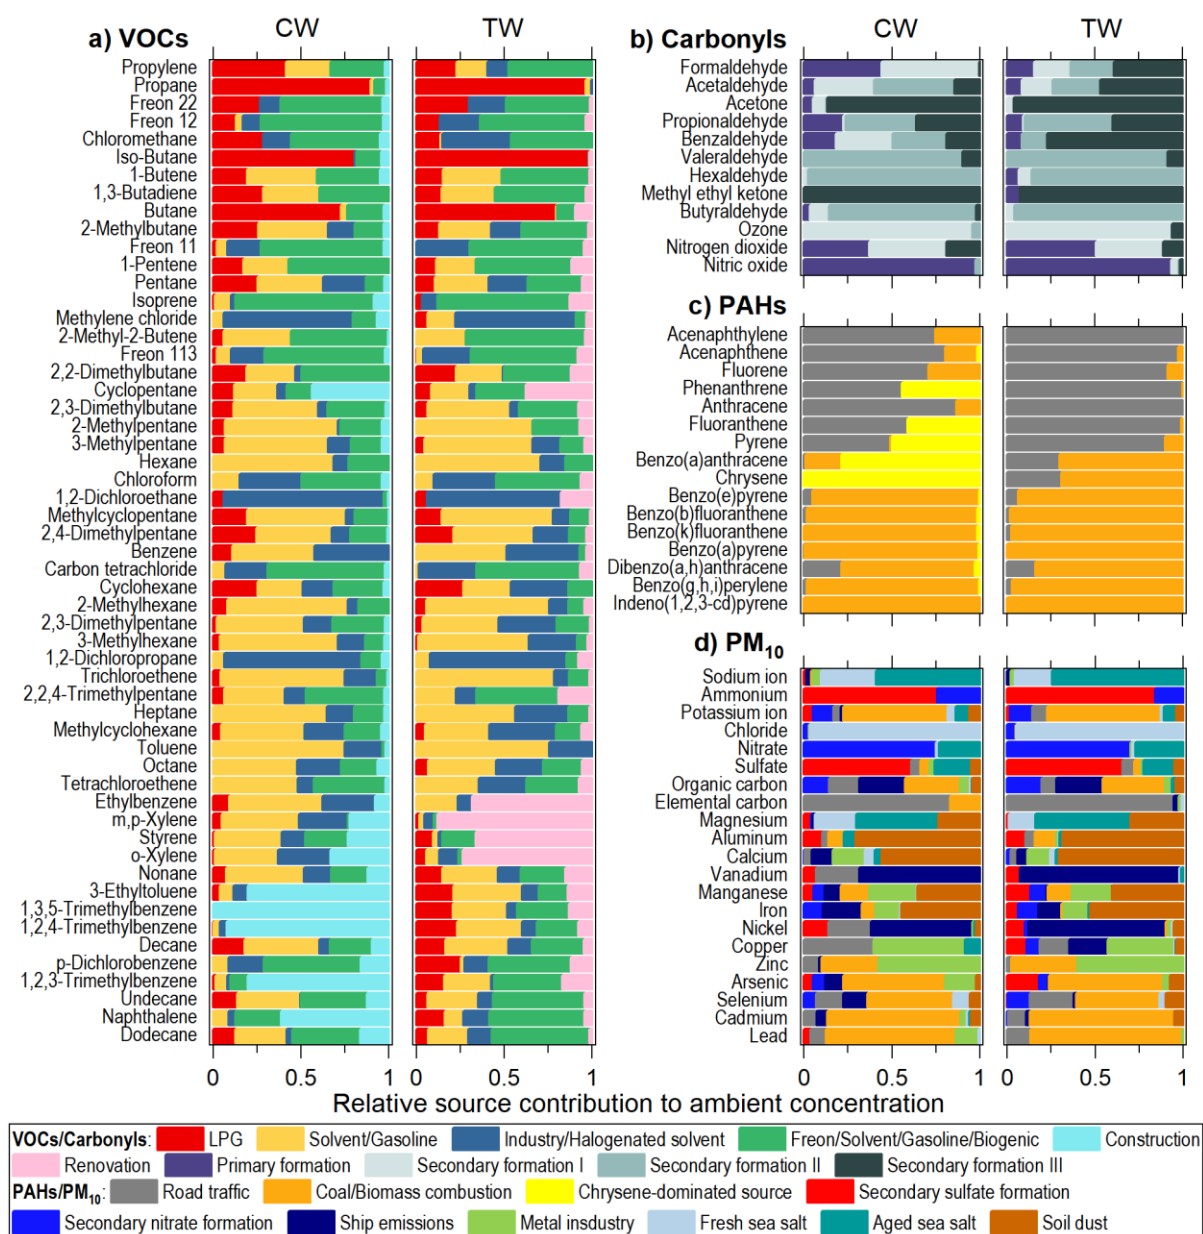

**Figure S2.** Source profiles derived from PMF analyses for (a) VOCs, (b) carbonyls, (c) PAHs, and (d) PM<sub>10</sub>. For each TAP category, the left and right panels represent the results for CW and TW sites, respectively.

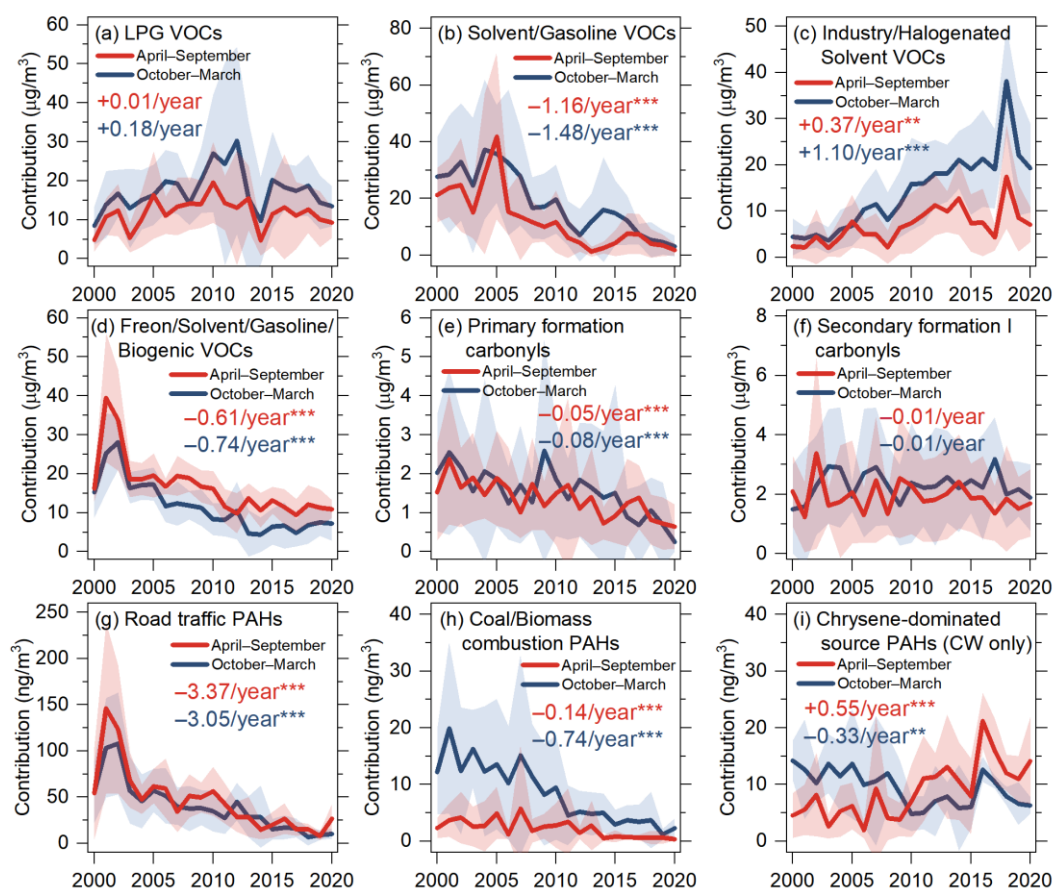

**Figure S3.** Inter-annual trends of source contributions to (a)–(d) VOCs, (e)–(f) carbonyls, and (g)–(i) PAHs averaged from CW and TW sites. The red and blue traces are the means derived from warmer months (i.e., April–September) and colder months (i.e., October–March) measurements, respectively, with the shaded bands representing  $\pm 1$  standard deviation. Sen's slope and significance level of Mann-Kendall trend test (\*:  $p < 0.05$ , \*\*:  $p < 0.01$ , \*\*\*:  $p < 0.001$ ) for warmer and colder months are displayed.

## Sources of VOCs

Four common VOC source factors are resolved at the CW and TW sites, as shown in Figure S2a. The first factor is named LPG. It is marked by high loadings of propane, iso-butane, and butane, which are often regarded as emissions associated with the use of liquified petroleum gas (LPG) in motor vehicles, cooking and heating.<sup>5</sup> This factor exhibited an increasing trend up to 2012, which then reversed as shown in Figure S3a. This pattern coincides with the evolution of the contribution from LPG-fueled vehicles in Hong Kong over the last two decades, and the continuous drop after 2012 is attributed to a catalytic converter replacement program for LPG vehicles implemented by the local government.<sup>6,7</sup> Such a characteristic long-term variation indicates that local LPG-fueled vehicles are the main source in this factor. The higher contribution observed in colder seasons (Figure S3a) is attributed to multiple reasons, including reduced photochemical activity, increased influence from regional transport from inner continental region associated with prevailing northerlies, and meteorological conditions (e.g., less frequent precipitation and shallower boundary layer) more favorable to accumulation and elevation of pollutants.

The second factor is named solvent/gasoline, for the high abundance of branched and straight-chain alkanes and BTEX (benzene, toluene, ethylbenzene and xylenes) apportioned to this factor. Previous local studies have shown that these VOCs are primarily associated with emissions from solvent use and gasoline vehicles.<sup>5,6,8</sup> As noted from Figure S3b, this factor displayed a distinctive downward trend after 2005, consistent with the series of VOC control measures implemented by the local government in phases since mid-2000s. Example measures included controlling VOC content of architectural paints, printing inks, consumer products (e.g., air fresheners, hairsprays, lubricants, etc.), and other VOC-containing products (e.g., adhesives, sealants, vehicle refinish paints, etc.). Control measures were also implemented to recover gasoline vapor released during vehicle refueling at gas stations and to tighten emissions standards of motor vehicles in accordance with the European Union standards.<sup>9</sup> Owing to the similar reasons that apply to LPG, higher contribution in colder seasons is also noted for this source factor.

The third factor is named industry/halogenated solvent as supported by multiple lines of evidence. First, high loading of halogenated VOCs and BTEX is present in this factor (Figure S2a), which are typically the key chemical constituents found in industrial emissions and solvents.<sup>5,10</sup> Second, this factor shows a distinctly higher contribution in colder seasons when regional contribution enhances (Figure S3c), aligning with the much more widespread industrial and solvent-related sources located in mainland China that often impose an exacerbated impact on local air quality in colder seasons due to regional transport. Furthermore, this factor exhibited a continuous upward trend over the last two decades, coinciding with the persistent growth in industry- and solvent use-related VOCs in China over the same period as shown by the nationwide emission inventory.<sup>11</sup> In particular, the inventory showed that anthropogenic non-methane VOCs emissions in China associated with industry and solvent use combined had quadrupled from 4.9 Tg in 2000 to 19.6 Tg in 2017. Though not being necessarily directly correlated, the relative increase of VOC contribution of our industry/halogenated solvent factor in colder seasons is very close to the emission inventory estimates, increasing from 4.4 to 19.1  $\mu\text{g}/\text{m}^3$  in the corresponding period (Figure S3c).

The fourth factor is named freon/solvent/gasoline/biogenic. The chemical profile exhibits a mixture of 1) Freons suggestive of release of these ozone-depleting substances from chlorofluorocarbons-containing materials (e.g., cell foam and refrigeration system),<sup>12</sup> 2) chloroform and carbon tetrachloride suggestive of solvent use, 3) alkenes and higher molecular weight VOCs (naphthalene, undecane and dodecane) suggestive of gasoline evaporation, and 4) isoprene indicative of vegetative emissions. This factor has a higher contribution in warmer months (Figure S3d), which is consistent with a hypothesis that all these sources are increasingly active as temperature increases due to their evaporative nature.

The last factor resolved at CW and TW sites are named CW site construction and TW site renovation, respectively (Figure S2a). The identity of these sources is evident by the coincidence in time with these activities as documented by the monitoring department.<sup>13</sup> As shown in the temporal trends in Figure S4a, the remarkable enhancement in contribution at CW in 2015–2018 is attributed to construction works of a new subway station within 100 m of the sampling site in 2015 and at the community complex building housing the sampling equipment in 2016–2018. The enhanced contribution at TW occurred in 2009–2014 (Figure S4b) and is associated with renovation works within and near the community center where the sampling site is situated. The two sources also have differing composition, reflecting the different nature

of these man-made sources. For example, naphthalene is discernibly higher in CW construction than TW renovation, which can be explained by off-gassing of naphthalene from building materials.<sup>14</sup> As mentioned in Section 3.1 of the main text, these local sources will not be included in the assessments of health risks and O<sub>3</sub> formation in this study.

### Sources of carbonyl compounds

Four carbonyl factors resembling a primary and three secondary formation sources are resolved at both locations (Figure S2b). The primary factor is signaled by a high loading of short-lived nitric oxide, which indicates primary emissions mainly traffic exhaust. The continuous declining trend and lack of seasonal variation in contribution support its nature (Figure S3e). The second to fourth factors are respectively named secondary formation I, II and III. Secondary formation I is heavily loaded with O<sub>3</sub> and nitrogen dioxide, which are associated with photochemical reactions. Secondary formation II and III differ in their abundance in the characteristic VOC oxidation products, with the former dominated by C<sub>4</sub> to C<sub>6</sub> aldehydes and the latter dominated by acetone and methyl ethyl ketone. The difference could be attributed to their differing photochemical formation and removal processes. All these secondary formation factors exhibit a higher contribution in colder months and no statistically significant inter-annual trend (Figures S3f and S4c&d).

### Sources of PAHs

Two common PAH factors are identified at CW and TW sites (Figure S2c). The first factor has a high loading of 3–4-ring PAHs, with a lack of seasonality and noticeable declining trend in contribution (Figure S3g), indicating an association with local road traffic. The second factor is identified as coal/biomass combustion. This factor dominates the contributions of 4–6-ring PAHs. Previous studies based on receptor modeling and diagnostic ratio analyses have shown that these PAHs in Hong Kong and the GBA are mainly associated with coal combustion and biomass burning.<sup>15,16</sup> The considerably higher contribution in colder seasons combined with the continuous reduction shown in Figure S3h further supports the source identity, given these sources primarily spread over the inland GBA with continuous improvement in air quality over the years as a result of various air pollution control efforts.<sup>17</sup>

A third factor is resolved at the CW site, showing a markedly high loading of chrysene and benzo(a)anthracene, and some other 3–4-ring PAHs. The temporal variation of this factor differs from the others in that it exhibits a statistically significant ( $p < 0.001$ ) upward trend during warmer seasons (Figure S3i). The benzo(a)anthracene / (benzo(a)anthracene + chrysene) and fluoranthene / (fluoranthene + pyrene) ratios of this factor are 0.18 and 0.47, respectively suggesting petrogenic emissions (e.g., release of uncombusted gasoline) and fossil fuel combustion.<sup>18</sup> While this factor is plausibly associated with traffic sources near the CW site, further study (possibly with higher time resolution measurement) is needed to identify its source origin(s). This factor is named chrysene-dominated source.



## Sources of PM<sub>10</sub>

Nine PM<sub>10</sub> sources are resolved at both CW and TW sites. These identified sources are consistent with those established in previous source apportionment studies derived from the same PM<sub>10</sub> speciation network data covering different periods, and hence they are not discussed in detail here.<sup>17,19</sup> Briefly, these factors are classified according to their characteristic markers, as illustrated in Figure S2d. These factors are secondary sulfate formation processes, secondary nitrate formation processes, road traffic, ship emissions, coal/biomass combustion, metal industry, fresh sea salt, aged sea salt, and soil dust. The seasonal inter-annual trends of these sources are provided in Figure S5.

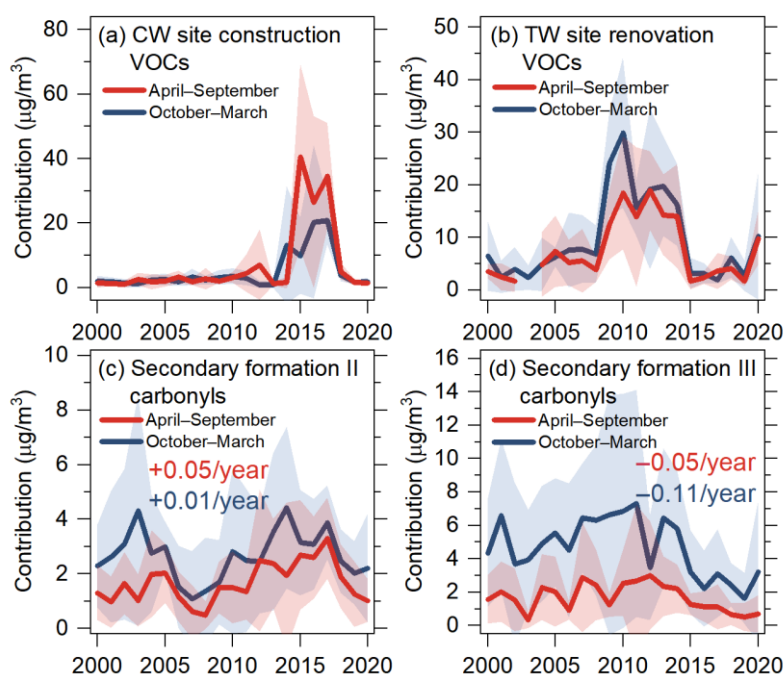

**Figure S4.** Inter-annual trends of source contributions to VOCs from (a) CW site construction and (b) TW site renovation, and to carbonyls from (c) secondary formation II and (d) secondary formation III. The red and blue traces are derived from warmer months (i.e., April–September) and colder months (i.e., October–March) measurements, respectively, with the shaded bands representing  $\pm 1$  standard deviation. The trends in panels (c) and (d) are averaged from CW and TW sites, with Sen’s slope and significance level of Mann-Kendall trend test (\*:  $p < 0.05$ , \*\*:  $p < 0.01$ , \*\*\*:  $p < 0.001$ ) for warmer and colder months displayed.



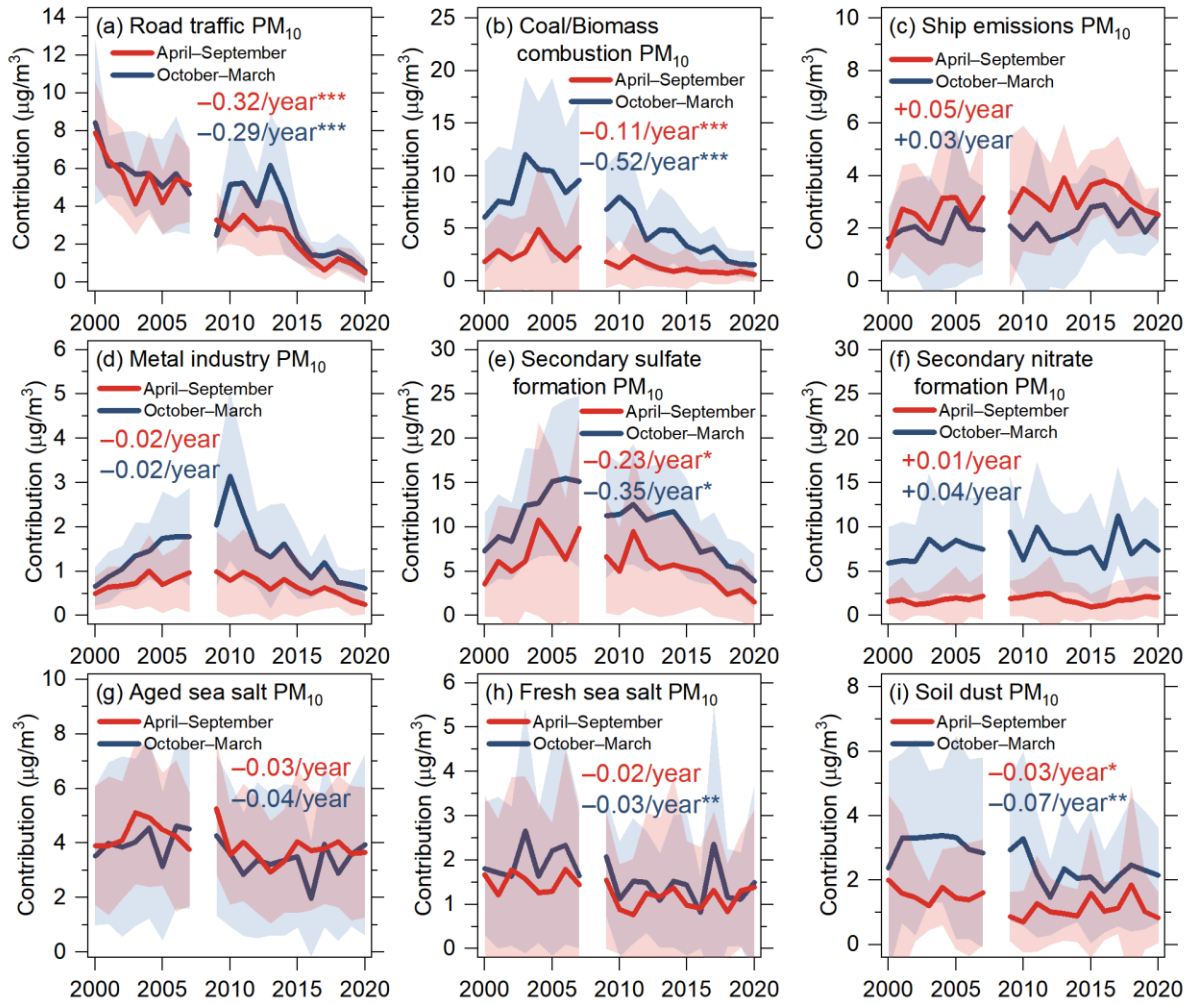

**Figure S5.** Inter-annual trends of source contributions to PM<sub>10</sub> averaged from CW and TW sites. The red and blue traces are derived from warmer months (i.e., April–September) and colder months (i.e., October–March) measurements, respectively, with the shaded bands representing  $\pm 1$  standard deviation. Sen's slope and significance level of Mann-Kendall trend test (\*:  $p < 0.05$ , \*\*:  $p < 0.01$ , \*\*\*:  $p < 0.001$ ) for warmer and colder months are displayed.

**Table S1.** Toxic air pollutants examined in this study

| VOCs (Sampling conducted twice a month)     |                             |                               |
|---------------------------------------------|-----------------------------|-------------------------------|
| 1,1,1-Trichloroethane                       | 2-Methylhexane              | Freon 12                      |
| 1,1,2,2-Tetrachloroethane                   | 2-Methylpentane             | Freon 22                      |
| 1,1,2-Trichloroethane                       | 3,6-Dimethyloctane          | Heptane                       |
| 1,1-Dichloroethane                          | 3-Chloropropene             | Hexachlorobutadiene           |
| 1,1-Dichloroethene                          | 3-Ethyltoluene              | Hexane                        |
| 1,2,3,5-Tetramethylbenzene                  | 3-Methyl-1-Pentene          | Hexylbenzene                  |
| 1,2,3-Trimethylbenzene                      | 3-Methylheptane             | Indan                         |
| 1,2,4,5-Tetramethylbenzene                  | 3-Methylhexane              | iso-Butane                    |
| 1,2,4-Trichlorobenzene                      | 3-Methylpentane             | iso-Butylbenzene              |
| 1,2,4-Trimethylbenzene                      | 4-Ethyltoluene              | Isoprene                      |
| 1,2,4-Trimethylcyclohexane                  | 4-Methyl-1-Pentene          | iso-Propylbenzene             |
| 1,2-Dibromoethane                           | 4-Methylheptane             | m,p-Xylene                    |
| 1,2-Dichloroethane                          | Benzene                     | m-/p-Chlorotoluene            |
| 1,2-Dichloropropane                         | Benzyl chloride             | m-Dichlorobenzene             |
| 1,2-Diethylbenzene                          | Bromodichloromethane        | Methylcyclohexane             |
| 1,3,5-Trimethylbenzene                      | Bromoethane                 | Methylcyclopentane            |
| 1,3-Butadiene                               | Bromoform                   | Methylene chloride            |
| 1,3-Diethylbenzene                          | Bromomethane                | Naphthalene                   |
| 1,4-Dichlorobutane                          | Bromotrchloromethane        | n-Butylbenzene                |
| 1,4-Diethylbenzene                          | Butane                      | Nonane                        |
| 1-Butene                                    | Carbon tetrachloride        | n-Propylbenzene               |
| 1-Butyne                                    | Chlorobenzene               | o-Chlorotoluene               |
| 1-Decene                                    | Chloroethane                | Octane                        |
| 1-Heptene                                   | Chloroethene                | o-Dichlorobenzene             |
| 1-Methylcyclohexene                         | Chloroform                  | o-Xylene                      |
| 1-Methylcyclopentene                        | Chloromethane               | p-Cymene                      |
| 1-Nonene                                    | cis-1,2-Dichloroethene      | p-Dichlorobenzene             |
| 1-Octene                                    | cis-1,2-Dimethylcyclohexane | Pentane                       |
| 1-Pentene                                   | cis-1,3-Dichloropropene     | Propane                       |
| 1-Propyne                                   | cis-2-Butene                | Propylene                     |
| 2,2,3-Trimethylbutane                       | cis-2-Heptene               | sec-Butylbenzene              |
| 2,2,4-Trimethylpentane                      | cis-2-Hexene                | Styrene                       |
| 2,2,5-Trimethylhexane                       | cis-2-Pentene               | tert-Butylbenzene             |
| 2,2-Dimethylbutane                          | cis-3-Heptene               | Tetrachloroethene             |
| 2,2-Dimethylhexane                          | cis-3-Methyl-2-Pentene      | Toluene                       |
| 2,2-Dimethylpropane                         | cis-4-Methyl-2-Pentene      | trans-1,2-Dichloroethene      |
| 2,3,4-Trimethylpentane                      | Cyclohexane                 | trans-1,2-Dimethylcyclohexane |
| 2,3-Dimethylbutane                          | Cyclohexene                 | trans-1,3-Dichloropropene     |
| 2,3-Dimethylpentane                         | Cyclopentane                | trans-2-Butene                |
| 2,4-Dimethylhexane                          | Cyclopentene                | trans-2-Heptene               |
| 2,4-Dimethylpentane                         | Decane                      | trans-2-Hexene                |
| 2,5-Dimethylhexane                          | Dibromochloromethane        | trans-2-Pentene               |
| 2-Ethyl-1-Butene                            | Dibromomethane              | trans-3-Heptene               |
| 2-Ethyltoluene                              | Dodecane                    | trans-3-Methyl-2-Pentene      |
| 2-Methyl-1-Butene                           | Ethylbenzene                | trans-4-Methyl-2-Pentene      |
| 2-Methyl-2-Butene                           | Freon 11                    | Trichloroethene               |
| 2-Methylbutane                              | Freon 113                   | Undecane                      |
| 2-Methylheptane                             | Freon 114                   | Xylenes                       |
| Carbonyls (Sampling conducted once a month) |                             |                               |
| 2,5-Dimethylbenzaldehyde                    | Crotonaldehyde              | o-Tolualdehyde                |
| Acetaldehyde                                | Formaldehyde                | Propionaldehyde               |
| Acetone                                     | Hexaldehyde                 | p-Tolualdehyde                |
| Acrolein                                    | Isovaleraldehyde            | Valeraldehyde                 |
| Benzaldehyde                                | Methyl ethyl ketone         |                               |
| Butyraldehyde/IBA                           | m-Tolualdehyde              |                               |

**Table S1. Continued**

| PAHs (Sampling conducted once a month)                              |                        |                        |
|---------------------------------------------------------------------|------------------------|------------------------|
| Acenaphthene                                                        | Benzo(e)pyrene         | Fluorene               |
| Acenaphthylene                                                      | Benzo(g,h,i)perylene   | Indeno(1,2,3-cd)pyrene |
| Anthracene                                                          | Benzo(k)fluoranthene   | Phenanthrene           |
| Benzo(a)anthracene                                                  | Chrysene               | Pyrene                 |
| Benzo(a)pyrene                                                      | Dibenzo(a,h)anthracene |                        |
| Benzo(b)fluoranthene                                                | Fluoranthene           |                        |
| Diesel PM and metal(loid)s (Sampling conducted once every six days) |                        |                        |
| Diesel PM                                                           | Nickel                 | Selenium               |
| Arsenic                                                             | Lead                   | Hexavalent chromium    |
| Beryllium                                                           | Manganese              |                        |
| Cadmium                                                             | Mercury                |                        |

**Table S2.** Unit risk estimates (URE) for individual toxic air pollutants and their average concentrations measured at Central/Western (CW) and Tsuen Wan (TW) sites in 2000–2004 and 2016–2020

| Toxic air pollutants            | URE,<br>(ug/m <sup>3</sup> ) <sup>-1</sup> | Average concentration in<br>2000-2004, ng/m <sup>3</sup> |        | Average concentration in<br>2016-2020, ng/m <sup>3</sup> |        |
|---------------------------------|--------------------------------------------|----------------------------------------------------------|--------|----------------------------------------------------------|--------|
|                                 |                                            | CW                                                       | TW     | CW                                                       | TW     |
| <i>VOCs</i>                     |                                            |                                                          |        |                                                          |        |
| 1,2-Dibromoethane               | 6.0E-04 <sup>a</sup>                       | 140.3*                                                   | 138.2* | 80.0*                                                    | 80.0*  |
| Benzene                         | 2.9E-05 <sup>b</sup>                       | 1877.5                                                   | 2610.6 | 1141.1                                                   | 1514.7 |
| Naphthalene                     | 3.4E-05 <sup>a</sup>                       | 1511.7                                                   | 1681.5 | 1283.0                                                   | 1115.8 |
| Carbon tetrachloride            | 4.2E-05 <sup>b</sup>                       | 930.6                                                    | 982.8  | 698.5                                                    | 701.2  |
| 1,2-Dichloroethane              | 2.6E-05 <sup>a</sup>                       | 192.8                                                    | 202.1  | 741.9                                                    | 786.8  |
| 1,3-Butadiene                   | 1.7E-04 <sup>b</sup>                       | 199.7                                                    | 306.3  | 51.0                                                     | 76.9   |
| p-Dichlorobenzene               | 1.1E-05 <sup>a</sup>                       | 599.5                                                    | 487.6  | 840.6                                                    | 446.5  |
| 1,2-Dichloropropane             | 1.0E-05 <sup>b</sup>                       | 173.0                                                    | 172.3  | 474.8                                                    | 484.9  |
| 1,1,2,2-Tetrachloroethane       | 5.8E-05 <sup>b</sup>                       | 167.4                                                    | 181.7  | 70.0*                                                    | 70.0*  |
| Methylene chloride              | 1.0E-06 <sup>b</sup>                       | 2849.7                                                   | 2915.5 | 4981.2                                                   | 3505.4 |
| Tetrachloroethene               | 6.1E-06 <sup>b</sup>                       | 2056.1                                                   | 879.8  | 542.4                                                    | 500.2  |
| Ethylbenzene                    | 2.5E-06 <sup>a</sup>                       | 1446.4                                                   | 1811.3 | 896.2                                                    | 1141.5 |
| Chloroethene                    | 7.8E-05 <sup>b</sup>                       | 73.4                                                     | 73.8   | 37.9*                                                    | 35.9*  |
| Bromodichloromethane            | 3.7E-05 <sup>b</sup>                       | 347.3                                                    | 331.9  | 70.0*                                                    | 70.0*  |
| Benzyl chloride                 | 4.9E-05 <sup>a</sup>                       | 82.7*                                                    | 92.9*  | 50.0*                                                    | 51.4*  |
| Hexachlorobutadiene             | 2.2E-05 <sup>a</sup>                       | 350.6                                                    | 399.4  | 110.0*                                                   | 110.0* |
| Chloroform                      | 5.3E-06 <sup>b</sup>                       | 648.8                                                    | 659.1  | 562.8                                                    | 436.7  |
| Trichloroethene                 | 4.1E-06 <sup>a</sup>                       | 786.1                                                    | 1561.6 | 212.7                                                    | 288.8  |
| 1,1,2-Trichloroethane           | 1.6E-05 <sup>a</sup>                       | 92.3*                                                    | 92.1*  | 65.3*                                                    | 64.1*  |
| 3-Chloropropene                 | 6.0E-06 <sup>a</sup>                       | 57.3                                                     | 73.8   | 30.0*                                                    | 31.2*  |
| Bromoform                       | 1.1E-06 <sup>a</sup>                       | 227.3                                                    | 236.5  | 115.9*                                                   | 120.3* |
| 1,1-Dichloroethane              | 1.6E-06 <sup>a</sup>                       | 98.5                                                     | 105.8  | 41.7*                                                    | 40.6*  |
| <i>Carbonyls</i>                |                                            |                                                          |        |                                                          |        |
| Formaldehyde                    | 1.3E-05 <sup>a</sup>                       | 5674.5                                                   | 5462.1 | 1742.9                                                   | 3959.0 |
| Acetaldehyde                    | 2.7E-06 <sup>b</sup>                       | 2287.2                                                   | 2386.6 | 1140.6                                                   | 1822.1 |
| <i>PAHs</i>                     |                                            |                                                          |        |                                                          |        |
| Dibenzo(a,h)anthracene          | 4.4E-01 <sup>c</sup>                       | 0.0                                                      | 0.1    | 0.0                                                      | 0.0    |
| Benzo(a)pyrene                  | 8.7E-02 <sup>c</sup>                       | 0.3                                                      | 0.4    | 0.0                                                      | 0.1    |
| Chrysene                        | 8.7E-03 <sup>c</sup>                       | 0.5                                                      | 0.7    | 0.6                                                      | 0.3    |
| Indeno(1,2,3-cd)pyrene          | 2.0E-02 <sup>c</sup>                       | 0.4                                                      | 0.6    | 0.1                                                      | 0.1    |
| Benzo(b)fluoranthene            | 1.2E-02 <sup>c</sup>                       | 0.5                                                      | 0.7    | 0.1                                                      | 0.1    |
| Fluoranthene                    | 8.7E-04 <sup>c</sup>                       | 4.1                                                      | 9.1    | 2.0                                                      | 1.2    |
| Benzo(k)fluoranthene            | 8.7E-03 <sup>c</sup>                       | 0.2                                                      | 0.3    | 0.0                                                      | 0.1    |
| Benzo(a)anthracene              | 1.3E-03 <sup>c</sup>                       | 0.3                                                      | 0.4    | 0.2                                                      | 0.1    |
| <i>Diesel PM / Metal(loid)s</i> |                                            |                                                          |        |                                                          |        |
| Diesel PM                       | 3.0E-04 <sup>b</sup>                       | 3744.8                                                   | 5358.9 | 719.4                                                    | 885.8  |
| Hexavalent chromium             | 1.5E-01 <sup>b</sup>                       | 0.2                                                      | 0.2    | 0.1*                                                     | 0.1*   |
| Arsenic                         | 4.3E-03 <sup>a</sup>                       | 4.2                                                      | 5.2    | 2.5                                                      | 2.5    |
| Cadmium                         | 4.2E-03 <sup>b</sup>                       | 1.6                                                      | 2.0    | 0.5                                                      | 0.5    |
| Nickel                          | 3.8E-04 <sup>c</sup>                       | 5.2                                                      | 6.0    | 3.9*                                                     | 4.4*   |
| Lead                            | 1.2E-05 <sup>b</sup>                       | 56.3                                                     | 71.5   | 12.473                                                   | 13.4   |
| Beryllium                       | 2.4E-03 <sup>a</sup>                       | 0.1*                                                     | 0.1*   | 0.1*                                                     | 0.1*   |

<sup>a</sup>From the Office of Air Quality Planning and Standards of the U.S. EPA; <sup>b</sup>From the Office of Environmental Health Hazard Assessment of the California Environmental Protection Agency; <sup>c</sup>From the Guidelines for Air Quality of the World Health Organization.

Note: Concentrations labeled with an asterisk denotes the average value is below method detection limit. Half detection limit was used to calculate the average concentration for below detection limit data. These species were mostly not included in the PMF analyses of this study.

**Table S3.** Human carcinogenicity classification by the International Agency for Research on Cancer (IARC) for TAPs considered in the PMF source apportionment analyses in this study

| Toxic air pollutants   | IARC group | Definition                                           |
|------------------------|------------|------------------------------------------------------|
| Formaldehyde           | 1          | Carcinogenic to humans                               |
| Benzene                | 1          | Carcinogenic to humans                               |
| Carbon tetrachloride   | 2B         | Possibly carcinogenic to humans                      |
| 1,2-Dichloroethane     | 2B         | Possibly carcinogenic to humans                      |
| Naphthalene            | 2B         | Possibly carcinogenic to humans                      |
| 1,3-Butadiene          | 1          | Carcinogenic to humans                               |
| Acetaldehyde           | 2B         | Possibly carcinogenic to humans                      |
| 1,2-Dichloropropane    | 1          | Carcinogenic to humans                               |
| p-Dichlorobenzene      | 2B         | Possibly carcinogenic to humans                      |
| Methylene chloride     | 2A         | Probably carcinogenic to humans                      |
| Tetrachloroethene      | 2A         | Probably carcinogenic to humans                      |
| Chloroform             | 2B         | Possibly carcinogenic to humans                      |
| Ethylbenzene           | 2B         | Possibly carcinogenic to humans                      |
| Trichloroethene        | 1          | Carcinogenic to humans                               |
| Arsenic                | 1          | Carcinogenic to humans                               |
| Chrysene               | 2B         | Possibly carcinogenic to humans                      |
| Benzo(a)pyrene         | 1          | Carcinogenic to humans                               |
| Dibenzo(a,h)anthracene | 2A         | Probably carcinogenic to humans                      |
| Nickel                 | 1          | Carcinogenic to humans                               |
| Cadmium                | 1          | Carcinogenic to humans                               |
| Fluoranthene           | 3          | Not classifiable as to its carcinogenicity to humans |
| Indeno(1,2,3-cd)pyrene | 2B         | Possibly carcinogenic to humans                      |
| Benzo(b)fluoranthene   | 2B         | Possibly carcinogenic to humans                      |
| Benzo(k)fluoranthene   | 2B         | Possibly carcinogenic to humans                      |
| Benzo(a)anthracene     | 2B         | Possibly carcinogenic to humans                      |
| Lead                   | 2A         | Probably carcinogenic to humans                      |

**Table S4.** Summary of PMF bootstrap and displacement results for VOCs, carbonyls, PAHs and PM<sub>10</sub> in this study

| VOCs at CW        |                  |          |                        |          |          |          |
|-------------------|------------------|----------|------------------------|----------|----------|----------|
| DISP Diagnostics: | Error Code:      | 0        | Largest Decrease in Q: | -5.254   | %dQ:     | -0.00199 |
|                   | Swaps by Factor: | 0        | 0                      | 0        | 0        | 0        |
| BS Mapping:       | Factor 1         | Factor 2 | Factor 3               | Factor 4 | Factor 5 | Unmapped |
| Boot Factor 1     | 79               | 0        | 0                      | 4        | 17       | 0        |
| Boot Factor 2     | 3                | 80       | 3                      | 4        | 10       | 0        |
| Boot Factor 3     | 3                | 0        | 96                     | 1        | 0        | 0        |
| Boot Factor 4     | 0                | 0        | 0                      | 100      | 0        | 0        |
| Boot Factor 5     | 0                | 0        | 0                      | 0        | 100      | 0        |
| VOCs at TW        |                  |          |                        |          |          |          |
| DISP Diagnostics: | Error Code:      | 0        | Largest Decrease in Q: | 0        | %dQ:     | 0        |
|                   | Swaps by Factor: | 0        | 0                      | 0        | 0        | 0        |
| BS Mapping:       | Factor 1         | Factor 2 | Factor 3               | Factor 4 | Factor 5 | Unmapped |
| Boot Factor 1     | 81               | 0        | 11                     | 7        | 1        | 0        |
| Boot Factor 2     | 0                | 100      | 0                      | 0        | 0        | 0        |
| Boot Factor 3     | 0                | 0        | 100                    | 0        | 0        | 0        |
| Boot Factor 4     | 1                | 0        | 5                      | 87       | 7        | 0        |
| Boot Factor 5     | 0                | 0        | 0                      | 0        | 100      | 0        |
| Carbonyls at CW   |                  |          |                        |          |          |          |
| DISP Diagnostics: | Error Code:      | 0        | Largest Decrease in Q: | 0        | %dQ:     | 0        |
|                   | Swaps by Factor: | 0        | 0                      | 0        | 0        | 0        |
| BS Mapping:       | Factor 1         | Factor 2 | Factor 3               | Factor 4 | Unmapped |          |
| Boot Factor 1     | 100              | 0        | 0                      | 0        | 0        |          |
| Boot Factor 2     | 0                | 100      | 0                      | 0        | 0        |          |
| Boot Factor 3     | 0                | 0        | 100                    | 0        | 0        |          |
| Boot Factor 4     | 7                | 13       | 0                      | 80       | 0        |          |
| Carbonyls at TW   |                  |          |                        |          |          |          |
| DISP Diagnostics: | Error Code:      | 0        | Largest Decrease in Q: | -0.015   | %dQ:     | -6.6E-05 |
|                   | Swaps by Factor: | 0        | 0                      | 0        | 0        |          |
| BS Mapping:       | Factor 1         | Factor 2 | Factor 3               | Factor 4 | Unmapped |          |
| Boot Factor 1     | 100              | 0        | 0                      | 0        | 0        |          |
| Boot Factor 2     | 0                | 99       | 0                      | 1        | 0        |          |
| Boot Factor 3     | 0                | 0        | 100                    | 0        | 0        |          |
| Boot Factor 4     | 0                | 10       | 0                      | 90       | 0        |          |

**Table S4.** Continued

|                   |                  | PAHs at CW             |                        |          |          |          |          |          |          |          |   |
|-------------------|------------------|------------------------|------------------------|----------|----------|----------|----------|----------|----------|----------|---|
| DISP Diagnostics: | Error Code:      | 0                      | Largest Decrease in Q: | 0        | %dQ:     | 0        |          |          |          |          |   |
|                   | Swaps by Factor: | 0                      | 0                      | 0        |          |          |          |          |          |          |   |
| BS Mapping:       | Factor 1         | Factor 2               | Factor 3               | Unmapped |          |          |          |          |          |          |   |
| Boot Factor 1     | 100              | 0                      | 0                      | 0        |          |          |          |          |          |          |   |
| Boot Factor 2     | 6                | 90                     | 4                      | 0        |          |          |          |          |          |          |   |
| Boot Factor 3     | 0                | 0                      | 100                    | 0        |          |          |          |          |          |          |   |
|                   |                  | PAHs at TW             |                        |          |          |          |          |          |          |          |   |
| DISP Diagnostics: | Error Code:      | 0                      | Largest Decrease in Q: | 0        | %dQ:     | 0        |          |          |          |          |   |
|                   | Swaps by Factor: | 0                      | 0                      |          |          |          |          |          |          |          |   |
| BS Mapping:       | Factor 1         | Factor 2               | Unmapped               |          |          |          |          |          |          |          |   |
| Boot Factor 1     | 100              | 0                      | 0                      |          |          |          |          |          |          |          |   |
| Boot Factor 2     | 0                | 100                    | 0                      |          |          |          |          |          |          |          |   |
|                   |                  | PM <sub>10</sub> at CW |                        |          |          |          |          |          |          |          |   |
| DISP Diagnostics: | Error Code:      | 0                      | Largest Decrease in Q: | -0.008   | %dQ:     | -8.1E-05 |          |          |          |          |   |
|                   | Swaps by Factor: | 0                      | 0                      | 0        | 0        | 0        | 0        | 0        | 0        | 0        | 0 |
| BS Mapping:       | Factor 1         | Factor 2               | Factor 3               | Factor 4 | Factor 5 | Factor 6 | Factor 7 | Factor 8 | Factor 9 | Unmapped |   |
| Boot Factor 1     | 100              | 0                      | 0                      | 0        | 0        | 0        | 0        | 0        | 0        | 0        | 0 |
| Boot Factor 2     | 0                | 89                     | 0                      | 0        | 8        | 3        | 0        | 0        | 0        | 0        | 0 |
| Boot Factor 3     | 0                | 0                      | 100                    | 0        | 0        | 0        | 0        | 0        | 0        | 0        | 0 |
| Boot Factor 4     | 0                | 0                      | 0                      | 100      | 0        | 0        | 0        | 0        | 0        | 0        | 0 |
| Boot Factor 5     | 0                | 0                      | 0                      | 0        | 100      | 0        | 0        | 0        | 0        | 0        | 0 |
| Boot Factor 6     | 0                | 0                      | 0                      | 0        | 0        | 100      | 0        | 0        | 0        | 0        | 0 |
| Boot Factor 7     | 0                | 0                      | 0                      | 0        | 0        | 1        | 99       | 0        | 0        | 0        | 0 |
| Boot Factor 8     | 0                | 0                      | 0                      | 0        | 0        | 0        | 0        | 100      | 0        | 0        | 0 |
| Boot Factor 9     | 0                | 0                      | 0                      | 0        | 0        | 0        | 0        | 0        | 100      | 0        | 0 |
|                   |                  | PM <sub>10</sub> at TW |                        |          |          |          |          |          |          |          |   |
| DISP Diagnostics: | Error Code:      | 0                      | Largest Decrease in Q: | 0        | %dQ:     | 0        |          |          |          |          |   |
|                   | Swaps by Factor: | 0                      | 0                      | 0        | 0        | 0        | 0        | 0        | 0        | 0        | 0 |
| BS Mapping:       | Factor 1         | Factor 2               | Factor 3               | Factor 4 | Factor 5 | Factor 6 | Factor 7 | Factor 8 | Factor 9 | Unmapped |   |
| Boot Factor 1     | 100              | 0                      | 0                      | 0        | 0        | 0        | 0        | 0        | 0        | 0        | 0 |
| Boot Factor 2     | 0                | 98                     | 0                      | 0        | 0        | 0        | 0        | 0        | 2        | 0        | 0 |
| Boot Factor 3     | 0                | 0                      | 100                    | 0        | 0        | 0        | 0        | 0        | 0        | 0        | 0 |
| Boot Factor 4     | 0                | 0                      | 0                      | 100      | 0        | 0        | 0        | 0        | 0        | 0        | 0 |
| Boot Factor 5     | 0                | 0                      | 0                      | 0        | 100      | 0        | 0        | 0        | 0        | 0        | 0 |
| Boot Factor 6     | 0                | 0                      | 0                      | 0        | 0        | 100      | 0        | 0        | 0        | 0        | 0 |
| Boot Factor 7     | 0                | 0                      | 0                      | 0        | 0        | 0        | 100      | 0        | 0        | 0        | 0 |
| Boot Factor 8     | 0                | 0                      | 0                      | 0        | 0        | 0        | 0        | 100      | 0        | 0        | 0 |
| Boot Factor 9     | 0                | 0                      | 0                      | 0        | 0        | 0        | 0        | 0        | 100      | 0        | 0 |



**Table S5.** Ratio of PMF-modeled versus measured species concentrations at CW and TW sites

| Ratio of PMF-modeled vs. measured concentration |      |      |                        |      |      |
|-------------------------------------------------|------|------|------------------------|------|------|
| <i>VOCs</i>                                     | CW   | TW   | <i>Carbonyls</i>       | CW   | TW   |
| 1,2,3-Trimethylbenzene                          | 1.02 | 1.02 | Acetaldehyde           | 0.94 | 0.91 |
| 1,2,4-Trimethylbenzene                          | 0.92 | 0.88 | Acetone                | 0.79 | 0.61 |
| 1,2-Dichloroethane                              | 0.96 | 0.91 | Benzaldehyde           | 0.81 | 0.38 |
| 1,2-Dichloropropane                             | 0.98 | 0.97 | Butyraldehyde/IBA      | 0.80 | 0.87 |
| 1,3,5-Trimethylbenzene                          | 0.92 | 1.01 | Formaldehyde           | 0.57 | 0.70 |
| 1,3-Butadiene                                   | 1.01 | 0.99 | Hexaldehyde            | 0.82 | 0.85 |
| 1-Butene                                        | 0.91 | 0.89 | Methyl ethyl ketone    | 0.73 | 0.32 |
| 1-Pentene                                       | 1.00 | 1.01 | Propionaldehyde        | 0.85 | 0.84 |
| 2,2,4-Trimethylpentane                          | 0.94 | 0.82 | Valeraldehyde          | 0.77 | 0.65 |
| 2,2-Dimethylbutane                              | 1.06 | 1.03 | Ozone                  | 0.86 | 0.95 |
| 2,3-Dimethylbutane                              | 1.01 | 0.99 | Nitrogen dioxide       | 0.88 | 0.95 |
| 2,3-Dimethylpentane                             | 0.96 | 0.98 | Nitric oxide           | 0.94 | 0.92 |
| 2,4-Dimethylpentane                             | 1.01 | 1.01 |                        |      |      |
| 2-Methyl-2-Butene                               | 1.03 | 1.01 | <i>PAHs</i>            | CW   | TW   |
| 2-Methylbutane                                  | 0.91 | 0.89 | Acenaphthene           | 0.78 | 0.74 |
| 2-Methylhexane                                  | 0.97 | 0.97 | Acenaphthylene         | 0.53 | 0.58 |
| 2-Methylpentane                                 | 0.89 | 0.87 | Anthracene             | 0.75 | 0.54 |
| 3-Ethyltoluene                                  | 0.98 | 0.94 | Benzo(a)anthracene     | 0.60 | 0.53 |
| 3-Methylhexane                                  | 0.93 | 0.92 | Benzo(a)pyrene         | 0.86 | 0.82 |
| 3-Methylpentane                                 | 0.92 | 0.91 | Benzo(b)fluoranthene   | 0.97 | 0.93 |
| Benzene                                         | 0.81 | 0.73 | Benzo(e)pyrene         | 0.84 | 0.76 |
| Butane                                          | 0.92 | 0.93 | Benzo(g,h,i)perylene   | 0.93 | 0.94 |
| Carbon tetrachloride                            | 0.97 | 0.97 | Benzo(k)fluoranthene   | 0.96 | 0.90 |
| Chloroform                                      | 0.92 | 0.97 | Chrysene               | 0.76 | 0.63 |
| Chloromethane                                   | 0.93 | 0.92 | Dibenzo(a,h)anthracene | 0.74 | 0.66 |
| Cyclohexane                                     | 0.74 | 0.76 | Fluoranthene           | 0.85 | 0.75 |
| Cyclopentane                                    | 0.91 | 0.93 | Fluorene               | 0.81 | 0.70 |
| Decane                                          | 0.92 | 0.85 | Indeno(1,2,3-cd)pyrene | 0.90 | 0.81 |
| Dodecane                                        | 0.90 | 0.92 | Phenanthrene           | 0.85 | 0.77 |
| Ethylbenzene                                    | 0.86 | 0.90 | Pyrene                 | 0.92 | 0.91 |
| Freon 11                                        | 0.97 | 0.95 |                        |      |      |
| Freon 113                                       | 0.98 | 0.97 | <i>PM<sub>10</sub></i> | CW   | TW   |
| Freon 12                                        | 0.96 | 0.94 | Sodium ion             | 0.99 | 0.99 |
| Freon 22                                        | 0.82 | 0.72 | Ammonium               | 0.99 | 0.99 |
| Heptane                                         | 0.89 | 0.87 | Potassium ion          | 0.97 | 0.98 |
| Hexane                                          | 0.90 | 0.92 | Chloride               | 1.00 | 1.00 |
| iso-Butane                                      | 0.95 | 0.92 | Nitrate                | 0.99 | 0.97 |
| Isoprene                                        | 0.69 | 0.78 | Sulfate                | 1.00 | 0.99 |
| m,p-Xylene                                      | 0.86 | 0.98 | Organic carbon         | 0.95 | 0.95 |
| Methylcyclohexane                               | 0.90 | 0.86 | Elemental carbon       | 0.97 | 0.99 |
| Methylcyclopentane                              | 0.98 | 0.98 | Magnesium              | 0.97 | 0.97 |
| Methylene chloride                              | 0.69 | 0.66 | Aluminum               | 0.93 | 0.91 |
| Naphthalene                                     | 0.78 | 0.74 | Calcium                | 0.97 | 0.97 |
| Nonane                                          | 0.90 | 0.83 | Vanadium               | 1.05 | 1.02 |
| Octane                                          | 1.02 | 0.97 | Manganese              | 0.99 | 0.99 |
| o-Xylene                                        | 0.91 | 0.98 | Iron                   | 0.98 | 0.98 |
| p-Dichlorobenzene                               | 0.89 | 0.93 | Nickel                 | 1.07 | 1.07 |
| Pentane                                         | 0.91 | 0.91 | Copper                 | 0.92 | 0.87 |
| Propane                                         | 0.92 | 0.90 | Zinc                   | 0.94 | 0.95 |
| Propylene                                       | 0.87 | 0.87 | Arsenic                | 0.91 | 0.92 |
| Styrene                                         | 0.80 | 0.18 | Selenium               | 0.91 | 0.92 |
| Tetrachloroethene                               | 0.83 | 0.92 | Cadmium                | 0.95 | 0.93 |
| Toluene                                         | 0.91 | 0.91 | Lead                   | 0.95 | 0.96 |
| Trichloroethene                                 | 0.88 | 0.89 |                        |      |      |
| Undecane                                        | 0.94 | 0.93 |                        |      |      |

**Table S6.** Summary of Sen's slope values for source contributions to VOCs and carbonyls by mass in  $\mu\text{g}/\text{m}^3/\text{year}$ , OFP in  $\mu\text{g}\text{-O}_3/\text{m}^3/\text{year}$  and ICRs in cancer cases per million/year from 2000 to 2020 (percentage in parentheses is the slope normalized by 2000 level) and significance level of the Mann-Kendall trend test

|      |                 | LPG              | Solvent/<br>Gasoline | Industry/<br>Halogenated<br>Solvent | Freon/Solvent/<br>Gasoline/<br>Biogenic | Primary<br>formation | Secondary<br>formation<br>I to III |
|------|-----------------|------------------|----------------------|-------------------------------------|-----------------------------------------|----------------------|------------------------------------|
| Mass | Sen's slope     | +0.07<br>(+1.0%) | -1.34<br>(-5.5%)     | +0.73<br>(+21.9%)                   | -0.69<br>(-4.4%)                        | -0.07<br>(-3.8%)     | -0.05<br>(-0.8%)                   |
|      | <i>p</i> -value | 0.526            | <0.001               | <0.001                              | <0.001                                  | <0.001               | 0.415                              |
| OFP  | Sen's slope     | +0.06<br>(+1.1%) | -2.42<br>(-5.5%)     | +0.73<br>(+21.9%)                   | -0.63<br>(-4.1%)                        | -0.39<br>(-3.8%)     |                                    |
|      | <i>p</i> -value | 0.566            | <0.001               | <0.001                              | <0.001                                  | <0.001               |                                    |
| ICRs | Sen's slope     | +0.02<br>(+0.3%) | -3.31<br>(-5.5%)     | +3.49<br>(+21.9%)                   | -2.55<br>(-4.4%)                        | -0.71<br>(-3.8%)     | -0.30<br>(-0.7%)                   |
|      | <i>p</i> -value | 0.651            | <0.001               | <0.001                              | <0.001                                  | <0.001               | 0.349                              |

## References

- (1) Norris, G.; Duvall, R.; Brown, S.; Bai, S. Positive Matrix Factorization (PMF) 5.0 Fundamentals and User Guide. **2014**.
- (2) Louie, P. K. K.; Watson, J. G.; Chow, J. C.; Chen, A.; Sin, D. W. M.; Lau, A. K. H. Seasonal Characteristics and Regional Transport of PM in Hong Kong. *Atmos. Environ.* **2005**, S1352231004011021. <https://doi.org/10.1016/j.atmosenv.2004.11.017>.
- (3) Gilbert, R. O. *Statistical Methods for Environmental Pollution Monitoring*; Van Nostrand Reinhold Co: New York, 1987.
- (4) Sen, P. K. Estimates of the Regression Coefficient Based on Kendall's Tau. *J. Am. Stat. Assoc.* **1968**, 63 (324), 1379–1389. <https://doi.org/10.1080/01621459.1968.10480934>.
- (5) Lau, A. K. H.; Yuan, Z.; Yu, J. Z.; Louie, P. K. K. Source Apportionment of Ambient Volatile Organic Compounds in Hong Kong. *Sci. Total Environ.* **2010**, 408 (19), 4138–4149. <https://doi.org/10.1016/j.scitotenv.2010.05.025>.
- (6) Lyu, X. P.; Zeng, L. W.; Guo, H.; Simpson, I. J.; Ling, Z. H.; Wang, Y.; Murray, F.; Louie, P. K. K.; Saunders, S. M.; Lam, S. H. M.; Blake, D. R. Evaluation of the Effectiveness of Air Pollution Control Measures in Hong Kong. *Environ. Pollut.* **2017**, 220, 87–94. <https://doi.org/10.1016/j.envpol.2016.09.025>.
- (7) Yao, D.; Lyu, X.; Murray, F.; Morawska, L.; Yu, W.; Wang, J.; Guo, H. Continuous Effectiveness of Replacing Catalytic Converters on Liquefied Petroleum Gas-Fueled Vehicles in Hong Kong. *Sci. Total Environ.* **2019**, 648, 830–838. <https://doi.org/10.1016/j.scitotenv.2018.08.191>.
- (8) Ho, K. F.; Ho, S. S. H.; Lee, S. C.; Louie, P. K. K.; Cao, J.; Deng, W. Volatile Organic Compounds in Roadside Environment of Hong Kong. *Aerosol Air Qual. Res.* **2013**, 13 (4), 1331–1347. <https://doi.org/10.4209/aaqr.2012.10.0278>.
- (9) HKEPD. *An Overview on Air Quality and Air Pollution Control in Hong Kong*. [https://www.epd.gov.hk/epd/english/environmentinhk/air/air\\_maincontent.html](https://www.epd.gov.hk/epd/english/environmentinhk/air/air_maincontent.html) (accessed 2023-12-11).
- (10) Lyu, X.; Guo, H.; Wang, Y.; Zhang, F.; Nie, K.; Dang, J.; Liang, Z.; Dong, S.; Zeren, Y.; Zhou, B.; Gao, W.; Zhao, S.; Zhang, G. Hazardous Volatile Organic Compounds in Ambient Air of China. *Chemosphere* **2020**, 246, 125731. <https://doi.org/10.1016/j.chemosphere.2019.125731>.
- (11) Li, M.; Zhang, Q.; Zheng, B.; Tong, D.; Lei, Y.; Liu, F.; Hong, C.; Kang, S.; Yan, L.; Zhang, Y.; Bo, Y.; Su, H.; Cheng, Y.; He, K. Persistent Growth of Anthropogenic Non-Methane Volatile Organic Compound (NMVOC) Emissions in China during 1990–2017: Drivers, Speciation and Ozone Formation Potential. *Atmospheric Chem. Phys.* **2019**, 19 (13), 8897–8913. <https://doi.org/10.5194/acp-19-8897-2019>.
- (12) Lickley, M.; Solomon, S.; Fletcher, S.; Velders, G. J. M.; Daniel, J.; Rigby, M.; Montzka, S. A.; Kuijpers, L. J. M.; Stone, K. Quantifying Contributions of Chlorofluorocarbon Banks to Emissions and Impacts on the Ozone Layer and Climate. *Nat. Commun.* **2020**, 11 (1), 1380. <https://doi.org/10.1038/s41467-020-15162-7>.
- (13) HKEPD. *EPD - Air Quality Reports*. <https://www.aqhi.gov.hk/en/download/air-quality-reports.html> (accessed 2023-12-11).

- (14) Jia, C.; Batterman, S. A Critical Review of Naphthalene Sources and Exposures Relevant to Indoor and Outdoor Air. *Int. J. Environ. Res. Public Health* **2010**, *7* (7), 2903–2939. <https://doi.org/10.3390/ijerph7072903>.
- (15) Liao, K.; Yu, J. Z. Abundance and Sources of Benzo[a]Pyrene and Other PAHs in Ambient Air in Hong Kong: A Review of 20-Year Measurements (1997–2016). *Chemosphere* **2020**, *259*, 127518. <https://doi.org/10.1016/j.chemosphere.2020.127518>.
- (16) Wang, Q.; Feng, Y.; Huang, X. H. H.; Griffith, S. M.; Zhang, T.; Zhang, Q.; Wu, D.; Yu, J. Z. Nonpolar Organic Compounds as PM<sub>2.5</sub> Source Tracers: Investigation of Their Sources and Degradation in the Pearl River Delta, China. *J. Geophys. Res. Atmospheres* **2016**, *121* (19), 11,862–11,879. <https://doi.org/10.1002/2016JD025315>.
- (17) Zhang, X.; Yuan, Z.; Li, W.; Lau, A. K. H.; Yu, J. Z.; Fung, J. C. H.; Zheng, J.; Yu, A. L. C. Eighteen-Year Trends of Local and Non-Local Impacts to Ambient PM<sub>10</sub> in Hong Kong Based on Chemical Speciation and Source Apportionment. *Atmospheric Res.* **2018**, *214*, 1–9. <https://doi.org/10.1016/j.atmosres.2018.07.004>.
- (18) Tobiszewski, M.; Namieśnik, J. PAH Diagnostic Ratios for the Identification of Pollution Emission Sources. *Environ. Pollut.* **2012**, *162*, 110–119. <https://doi.org/10.1016/j.envpol.2011.10.025>.
- (19) Yuan, Z.; Yadav, V.; Turner, J. R.; Louie, P. K. K.; Lau, A. K. H. Long-Term Trends of Ambient Particulate Matter Emission Source Contributions and the Accountability of Control Strategies in Hong Kong over 1998–2008. *Atmos. Environ.* **2013**, *76*, 21–31. <https://doi.org/10.1016/j.atmosenv.2012.09.026>.
